# Supplementary material
Source: publisher figshare collection journal article supplement (https://sage.figshare.com/ndownloader/files/14746616)
Supplement: Supplementary file 1 [file 14746616]

## Sheet: Introduction
	resamplepopsab.xlsx	http://woodm.myweb.port.ac.uk/SL/resamplepopsab.xlsx
	Michael Wood, Portsmouth University Business School, michaelwoodSLG@gmail.com or michael.wood@port.ac.uk, September 2018	https://arxiv.org/abs/1803.06214
		http://woodm.myweb.port.ac.uk/SL/resample.xlsx
	This spreadsheet is set up to produce a bootstrapped confidence distribution for the difference between the means of two populations, A and B, based on the data in the Sample sheet (tab below). The bootstrapped distribution is in the Lots of resamples sheet (tab below). There is a very brief explanation of bootstrapping in the Bootstrap sheet (tab below), and a more extended explanation in the ar…	https://soths.files.wordpress.com/2018/12/resample.xlsx
	This spreadsheet is for resampling - analysing random samples taken from a sample of data. The first example below should give you an idea how it works. Then there is a bit more explanation, and some more examples showing it in action. It is surprisingly flexible: it will, for example, test various statistical hypotheses, estimate confidence intervals and confidence levels by bootstrapping, and s…
	Example 1, part 1: Does vegetarianism improve wellbeing?(Randomization test to see if two population means are likely to be different)
	The (fictional) data in the Sample sheet (tab at the bottom) gives Wellbeing scores for a random sample of 20 people, and whether they are vegetarians or not. The mean of the vegetarian score is 10 more than the omnivores (non-vegetarians). But perhaps this is just a fluke; with another 20 people the omnivores might do better? To find out how likely this is click on the Single resample tab. The s…
	The spreadsheet should be set up for this example with the pull down menu in the orange cell in the Sample sheet set to Difference of two means, the orange cells the Single resample sheet set to WITHOUT replacement second column fixed, and Resample size same as sample size.
	Notes on how this spreadsheet works
	You can delete the data in the green cells in the Sample sheet, put your own data in and edit the yellow column headings. (You can paste your data from elsewhere but don't use Cut in the green cells as this will disturb the formulae on which the spreadsheet depends.) Then you can either analyze it in the same way, or do something else. To see the possibilities start with the Sample sheet, read th…
	Resampling WITHOUT replacement means taking a random "resample" from a sample of data without replacing each item after it has been selected. This is like SHUFFLING a pack of cards (the original sample) and dealing a hand (a resample). If the original sample were a population of people, then each resample will be a random sample from this population.
	Resampling WITH replacement means that after each item is randomly selected, it is replaced so that every item in the resample is chosen from the whole of the original sample. This means that each member of the original sample is equally likely to be selected. Some items in the original sample might not appear, and others may appear more than once. It's like taking a SAMPLE FROM AN INFINITE POPUL…
	Resampling with and without replacement are standard phrases, but the computer metaphors COPY-PASTE (for resampling with replacement), and CUT-PASTE (for resampling without replacement) are perhaps more accurate because these get over the idea that when resampling with replacement it is copies of the original items which go in the resample.
	If the answers you are getting are not sensible or contain error messages like #DIV/0!, try pressing F9. If this doesn't work make sure you aren't asking for something silly like a difference of means without entering a second column of data.
	If each item in your data consists of one of two categories - yes/no, male/female, head/tail, etc - this can be coded as 1 for one category and 0 for the other. Then the average or mean gives you the proportion of the data in the first category. See Example 2 for an example.
	The spreadsheet should be set to recalculate automatically except for the data tables that store the resample results in the Lots of resamples sheet. To check or change this: Formulas - Calculation Options - Automatic except for Data tables.
	There are some notes on extensions or changes you might want to make to this spreadsheet in the Extras sheet.
	Example 1, part 2: What's the likely error in estimating the mean wellness score from a sample of 9 vegetarians? (Bootstrap confidence interval)
	In the Sample sheet, delete the 11 rows of non-vegetarian data, click on the orange cell and set the drop-down menu to Mean of first column. Then, in the Single resample sheet, set the left hand orange cell menu to WITH replacement (first column only). In the Lots of resamples sheet, leave the orange cell set to 1000 resamples, and press F9 to recalculate the spreadsheet. You should see a so-call…
	Example 1, part 3: What is likely error in the difference of two means? (Bootstrap confidence interval for the difference of two means)
	Start with the original spreadsheet set up as for Example 1 part 1. Now go to the Single resample sheet and in the drop down menu in the left hand orange cell, choose WITH replacement, both columns. Now go to Lots of resamples and press F9. The percentiles will now give a bootstrapped confidence interval for the difference of the two means, and (Sometimes it may be helpful to fix the resampling s…
	Example 1, part 4: How confident should we be that vegetrianism really does improve wellbing?
	Following on from part 3 above, if you enter 0 in the green cell under 97.5% you will get an estimate of the confidence of the overall mean difference in the target population being positive - ie the vegetarian score being higher - this should be about 90%. Parts 1, 3 and 4 are three different ways of analysing the same problems - each has its pros and cons.
	Example 2: How many girls and boys are likely in families of eight? (Binomial distribution)
	Delete the data in the green cells in the Sample sheet, and the headings in the yellow cells. Put 1 and 0 in the first two cells of the left hand column and put Girls as the heading in the yellow cell. Set the drop down menu in the orange cell to Total. In the Single resample sheet, set the left hand drop down menu to WITH replacement (first column only), and the right hand orange cell to Resampl…
	More possibilities
	This spreadsheet will do simulation equivalents of many of the standard techniques in statistics textbooks including various significance tests, confidence intervals for proportions or correlations, confidence interval for the difference of two proportions, deciding on a suitable sample size (just try different resample sizes), generating probability distributions like the binomial, hypergeometri…

## Sheet: Sample
			Sample
	StatisticsType:	2	Put column headings in the yellow cells and the data (max 500 rows) in the green cells below. Don't leave any gaps. If you only have one column of data, put it in the first column. Check that the Sample size below is correct. If you want to compare two means put the numbers in the first column and the group labels in the second. To change the statistic to be analysed click on the orange cell. The…
	Sample Reference no	Random number	First Column: Score	Second Column: Population		Difference of two means (or proportions)		0.3
	1	0.38572	8	A		Sample size		20
	2	0.655863	5	A
	3	0.580761	6	A		The first column should contain numbers or 1s and 0s, and the second column group labels
	4	0.0630343	6	A			Second Column: Population	Second Column: Population
	5	0.983373	6	A		Put two group labels in cells on right =>	A	B
	6	0.939694	5	A		Group mean or proportion	6.3	6
	7	0.0902708	8	A
	8	0.160662	7	A
	9	0.323296	7	A
	10	0.660887	5	A
	11	0.331257	8	B
	12	0.647898	7	B
	13	0.447946	5	B
	14	0.0123578	6	B
	15	0.33419	3	B
	16	0.12601	8	B
	17	0.747414	6	B
	18	0.47738	6	B
	19	0.600319	3	B
	20	0.639319	8	B

## Sheet: Single resample
	Overall Max resamples	StatisticType	WITHOUT/WITH REP		SECOND COLUMN	Single Resample
	500	2	2		3	The results of the resample are in the pink cell. Press F9 (or Formulas - Calculate Now) to see the data shuffling to produce another resample. To change how the columns are resampled click on the orange cell on the left - if in doubt press F9 to see what happens. If you want to change the resample size click on the other orange cell. Then go to the Lots of resamples sheet by clicking on the tab …
						WITH replacement, BOTH columns
	Resample ref	Resample without replacement	Resample with replacement	First Column	Second column	First Column: Score	Second Column: Population		Difference of two means (or proportions)		0.030303
	1	12	2	2	2	5	A		Resample size same as sample size		20
	2	5	20	20	20	8	B		8
	3	9	3	3	3	6	A
	4	19	15	15	15	3	B			Second Column: Population	Second Column: Population
	5	1	12	12	12	7	B			A	B
	6	2	13	13	13	5	B		Group mean or proportion	6.36364	6.33333
	7	18	10	10	10	5	A
	8	16	7	7	7	8	A
	9	15	9	9	9	7	A		For an explanation of WITH/WITHOUT REPLACEMENT,
	10	4	4	4	4	6	A		see Notes on how this spreadsheet works in the Introduction (tab below).
	11	14	12	12	12	7	B
	12	6	4	4	4	6	A
	13	11	20	20	20	8	B
	14	20	19	19	19	3	B
	15	13	16	16	16	8	B
	16	17	8	8	8	7	A
	17	3	16	16	16	8	B
	18	10	7	7	7	8	A
	19	8	9	9	9	7	A
	20	7	2	2	2	5	A
	21
	22
	23
	24
	25
	26
	27
	28
	29
	30
	31
	32
	33
	34
	35
	36
	37
	38
	39
	40
	41
	42
	43
	44
	45
	46
	47
	48
	49
	50
	51
	52
	53
	54
	55
	56
	57
	58
	59
	60
	61
	62
	63
	64
	65
	66
	67
	68
	69
	70
	71
	72
	73
	74
	75
	76
	77
	78
	79
	80
	81
	82
	83
	84
	85
	86
	87
	88
	89
	90
	91
	92
	93
	94
	95
	96
	97
	98
	99
	100
	101
	102
	103
	104
	105
	106
	107
	108
	109
	110
	111
	112
	113
	114
	115
	116
	117
	118
	119
	120
	121
	122
	123
	124
	125
	126
	127
	128
	129
	130
	131
	132
	133
	134
	135
	136
	137
	138
	139
	140
	141
	142
	143
	144
	145
	146
	147
	148
	149
	150
	151
	152
	153
	154
	155
	156
	157
	158
	159
	160
	161
	162
	163
	164
	165
	166
	167
	168
	169
	170
	171
	172
	173
	174
	175
	176
	177
	178
	179
	180
	181
	182
	183
	184
	185
	186
	187
	188
	189
	190
	191
	192
	193
	194
	195
	196
	197
	198
	199
	200
	201
	202
	203
	204
	205
	206
	207
	208
	209
	210
	211
	212
	213
	214
	215
	216
	217
	218
	219
	220
	221
	222
	223
	224
	225
	226
	227
	228
	229
	230
	231
	232
	233
	234
	235
	236
	237
	238
	239
	240
	241
	242
	243
	244
	245
	246
	247
	248
	249
	250
	251
	252
	253
	254
	255
	256
	257
	258
	259
	260
	261
	262
	263
	264
	265
	266
	267
	268
	269
	270
	271
	272
	273
	274
	275
	276
	277
	278
	279
	280
	281
	282
	283
	284
	285
	286
	287
	288
	289
	290
	291
	292
	293
	294
	295
	296
	297
	298
	299
	300
	301
	302
	303
	304
	305
	306
	307
	308
	309
	310
	311
	312
	313
	314
	315
	316
	317
	318
	319
	320
	321
	322
	323
	324
	325
	326
	327
	328
	329
	330
	331
	332
	333
	334
	335
	336
	337
	338
	339
	340
	341
	342
	343
	344
	345
	346
	347
	348
	349
	350
	351
	352
	353
	354
	355
	356
	357
	358
	359
	360
	361
	362
	363
	364
	365
	366
	367
	368
	369
	370
	371
	372
	373
	374
	375
	376
	377
	378
	379
	380
	381
	382
	383
	384
	385
	386
	387
	388
	389
	390
	391
	392
	393
	394
	395
	396
	397
	398
	399
	400
	401
	402
	403
	404
	405
	406
	407
	408
	409
	410
	411
	412
	413
	414
	415
	416
	417
	418
	419
	420
	421
	422
	423
	424
	425
	426
	427
	428
	429
	430
	431
	432
	433
	434
	435
	436
	437
	438
	439
	440
	441
	442
	443
	444
	445
	446
	447
	448
	449
	450
	451
	452
	453
	454
	455
	456
	457
	458
	459
	460
	461
	462
	463
	464
	465
	466
	467
	468
	469
	470
	471
	472
	473
	474
	475
	476
	477
	478
	479
	480
	481
	482
	483
	484
	485
	486
	487
	488
	489
	490
	491
	492
	493
	494
	495
	496
	497
	498
	499
	500

## Sheet: Lots of resamples
													Lots of resamples
	NoResamples	2											Always start by pressing F9 to update this sheet. Put numbers in green cells for percentages and percentiles. Click Orange cell to choose 20 (to see how it works) or 1000 resamples (like the Single resample).
		RESAMPLE LIST 1		RESAMPLE LIST 2	THESE COLUMNS ARE FOR THE GRAPH ..........................			PERCENTAGE STATISTICS IN TABLE (CONTIF DOES NOT WORK!)					1000 resamples		WITH replacement, BOTH columns
		0		0.030303			Top of interval	Percentage above	Percentage equal to	Percentage equal to	Percentage below	P	Difference of two means (or proportions)		Mid-point of interval	Number of resamples
	1	0	1	-0.0952381	log (max-min)	0.64025	-4.75	0	0	0	0	0	0.030303		-5	0
	2	0	2	1.08333	unit (to fit between 10 and 100)	0.1	-4.25	1	0	0	0	1	1.08333		-4.5	0
	3	0	3	0.0416667	bottom bar in units	-16	-3.75	0	0	0	0	0	0.0416667		-4	0
	4	0	4	0.272727	top bar in units	28	-3.25	0	0	0	0	0	0.272727		-3.5	0
	5	0	5	-0.505051	unit span	45	-2.75	0	0	0	1	1	-0.505051		-3	0
	6	0	6	1.13333	new unit	0.5	-2.25	1	0	0	0	1	1.13333		-2.5	0
	7	0	7	0.802198	bottom bar mid pt	-2	-1.75	0	0	0	0	1	0.802198		-2	0
	8	0	8	0.833333	top bar mid point	3	-1.25	0	0	0	0	1	0.833333		-1.5	10
	9	0	9	1.68687	Total bars	24	-0.75	1	0	0	0	1	1.68687		-1	64		Sample value:		0.3
	10	0	10	-1.28571	Non zero bars	11	-0.25	0	0	0	1	1	-1.28571		-0.5	150		1000 resamples (size = 20) WITH replacement, BOTH columns
	11	0	11	0.525253	Graph bottom mid pt	-5	0.25	0	0	0	0	1	0.525253		0	245		Mean		0.284948
	12	0	12	0.505051			0.75	0	0	0	0	1	0.505051		0.5	279		Median		0.296703
	13	0	13	0.2			1.25	0	0	0	0	0	0.2		1	169		Maximum		2.76768
	14	0	14	0.208333			1.75	0	0	0	0	0	0.208333		1.5	66		Minimum		-1.6
	15	0	15	1.25253			2.25	1	0	0	0	1	1.25253		2	13
	16	0	16	1.4			2.75	1	0	0	0	1	1.4		2.5	3		Percentile	0.025	-1.04167
	17	0	17	0.458333			3.25	0	0	0	0	1	0.458333		3	1		Percentile	0.975	1.65682
	18	0	18	-0.458333			3.75	0	0	0	1	1	-0.458333		3.5	0		Percentage above	1	0.145
	19	0	19	0.0416667			4.25	0	0	0	0	0	0.0416667		4	0		Percentage equal to
	20	0	20	0.285714			4.75	0	0	0	0	0	0.285714		4.5	0		Percentage equal to
			21	0.252747			5.25	0	0	0	0	0	0.252747		5	0		Percentage below
			22	0.916667			5.75	0	0	0	0	1	0.916667		5.5	0
			23	0			6.25	0	1	1	0	0	0		6	0
			24	1.20833				1	0	0	0	1	1.20833		6.5	0
			25	-0.989899				0	0	0	1	1	-0.989899		Total	1000
			26	0.0606061				0	0	0	0	0	0.0606061		(Resamples exactly half way between two mid-points are included in the frequency for the lower interval.)
			27	-0.2				0	0	0	1	0	-0.2
			28	0.040404				0	0	0	0	0	0.040404
			29	1.375				1	0	0	0	1	1.375
			30	0.8				0	0	0	0	1	0.8
			31	0.444444				0	0	0	0	1	0.444444
			32	0.0238095				0	0	0	0	0	0.0238095
			33	-0.666667				0	0	0	1	1	-0.666667
			34	0.8				0	0	0	0	1	0.8
			35	1.11905				1	0	0	0	1	1.11905
			36	-0.958333				0	0	0	1	1	-0.958333
			37	-0.0808081				0	0	0	1	0	-0.0808081
			38	-0.3				0	0	0	1	1	-0.3
			39	0.292929				0	0	0	0	0	0.292929
			40	-0.232323				0	0	0	1	0	-0.232323
			41	-0.121212				0	0	0	1	0	-0.121212
			42	0.291667				0	0	0	0	0	0.291667
			43	0.373737				0	0	0	0	1	0.373737
			44	0.714286				0	0	0	0	1	0.714286
			45	-0.458333				0	0	0	1	1	-0.458333
			46	1.41414				1	0	0	0	1	1.41414
			47	-0.791667				0	0	0	1	1	-0.791667
			48	0.939394				0	0	0	0	1	0.939394
			49	-0.030303				0	0	0	1	0	-0.030303
			50	1.53333				1	0	0	0	1	1.53333
			51	-0.166667				0	0	0	1	0	-0.166667
			52	1.20833				1	0	0	0	1	1.20833
			53	1.2				1	0	0	0	1	1.2
			54	0.3				0	0	0	0	1	0.3
			55	1.04167				1	0	0	0	1	1.04167
			56	0.967033				0	0	0	0	1	0.967033
			57	1				0	0	0	0	1	1
			58	-0.8				0	0	0	1	1	-0.8
			59	0.212121				0	0	0	0	0	0.212121
			60	0.25				0	0	0	0	0	0.25
			61	0				0	1	1	0	0	0
			62	-0.416667				0	0	0	1	1	-0.416667
			63	0.375				0	0	0	0	1	0.375
			64	0.833333				0	0	0	0	1	0.833333
			65	1.16667				1	0	0	0	1	1.16667
			66	0.933333				0	0	0	0	1	0.933333
			67	1.25				1	0	0	0	1	1.25
			68	0.555556				0	0	0	0	1	0.555556
			69	0.787879				0	0	0	0	1	0.787879
			70	-0.0416667				0	0	0	1	0	-0.0416667
			71	0.241758				0	0	0	0	0	0.241758
			72	-0.1				0	0	0	1	0	-0.1
			73	-0.747475				0	0	0	1	1	-0.747475
			74	0.666667				0	0	0	0	1	0.666667
			75	0.131868				0	0	0	0	0	0.131868
			76	-1.41667				0	0	0	1	1	-1.41667
			77	-0.0606061				0	0	0	1	0	-0.0606061
			78	1.12121				1	0	0	0	1	1.12121
			79	0.0769231				0	0	0	0	0	0.0769231
			80	-0.362637				0	0	0	1	1	-0.362637
			81	0.434343				0	0	0	0	1	0.434343
			82	0.690476				0	0	0	0	1	0.690476
			83	0.8				0	0	0	0	1	0.8
			84	0.291667				0	0	0	0	0	0.291667
			85	0.4				0	0	0	0	1	0.4
			86	0.171717				0	0	0	0	0	0.171717
			87	0.616162				0	0	0	0	1	0.616162
			88	-0.151515				0	0	0	1	0	-0.151515
			89	0.375				0	0	0	0	1	0.375
			90	0.40404				0	0	0	0	1	0.40404
			91	0.0769231				0	0	0	0	0	0.0769231
			92	0.010989				0	0	0	0	0	0.010989
			93	0.575758				0	0	0	0	1	0.575758
			94	0.6				0	0	0	0	1	0.6
			95	0.375				0	0	0	0	1	0.375
			96	-0.020202				0	0	0	1	0	-0.020202
			97	1.54945				1	0	0	0	1	1.54945
			98	-0.010101				0	0	0	1	0	-0.010101
			99	-1				0	0	0	1	1	-1
			100	1.78571				1	0	0	0	1	1.78571
			101	0				0	1	1	0	0	0
			102	0.979798				0	0	0	0	1	0.979798
			103	1.0625				1	0	0	0	1	1.0625
			104	0.813187				0	0	0	0	1	0.813187
			105	1.16667				1	0	0	0	1	1.16667
			106	0.959596				0	0	0	0	1	0.959596
			107	0.263736				0	0	0	0	0	0.263736
			108	0.434343				0	0	0	0	1	0.434343
			109	0.384615				0	0	0	0	1	0.384615
			110	0.318681				0	0	0	0	1	0.318681
			111	1.74747				1	0	0	0	1	1.74747
			112	0.30303				0	0	0	0	1	0.30303
			113	-0.363636				0	0	0	1	1	-0.363636
			114	0.131313				0	0	0	0	0	0.131313
			115	0.595238				0	0	0	0	1	0.595238
			116	-0.3				0	0	0	1	1	-0.3
			117	-0.291667				0	0	0	1	0	-0.291667
			118	-0.4				0	0	0	1	1	-0.4
			119	0.357143				0	0	0	0	1	0.357143
			120	0.313131				0	0	0	0	1	0.313131
			121	0.505495				0	0	0	0	1	0.505495
			122	0.191919				0	0	0	0	0	0.191919
			123	-0.2				0	0	0	1	0	-0.2
			124	0.266667				0	0	0	0	0	0.266667
			125	0.0714286				0	0	0	0	0	0.0714286
			126	0.444444				0	0	0	0	1	0.444444
			127	0.291667				0	0	0	0	0	0.291667
			128	-0.0238095				0	0	0	1	0	-0.0238095
			129	0.40404				0	0	0	0	1	0.40404
			130	0.916667				0	0	0	0	1	0.916667
			131	-1.29167				0	0	0	1	1	-1.29167
			132	0.125				0	0	0	0	0	0.125
			133	-0.923077				0	0	0	1	1	-0.923077
			134	0.78022				0	0	0	0	1	0.78022
			135	-0.25				0	0	0	1	0	-0.25
			136	1.2				1	0	0	0	1	1.2
			137	-0.916667				0	0	0	1	1	-0.916667
			138	-0.958333				0	0	0	1	1	-0.958333
			139	-0.535354				0	0	0	1	1	-0.535354
			140	-0.67033				0	0	0	1	1	-0.67033
			141	0.252525				0	0	0	0	0	0.252525
			142	0.727273				0	0	0	0	1	0.727273
			143	0.547619				0	0	0	0	1	0.547619
			144	1.2619				1	0	0	0	1	1.2619
			145	-0.252747				0	0	0	1	0	-0.252747
			146	-0.252747				0	0	0	1	0	-0.252747
			147	-0.458333				0	0	0	1	1	-0.458333
			148	0.416667				0	0	0	0	1	0.416667
			149	1.02198				1	0	0	0	1	1.02198
			150	0.857143				0	0	0	0	1	0.857143
			151	-0.69697				0	0	0	1	1	-0.69697
			152	-1.3				0	0	0	1	1	-1.3
			153	-1.11905				0	0	0	1	1	-1.11905
			154	0.737374				0	0	0	0	1	0.737374
			155	0.1				0	0	0	0	0	0.1
			156	1.09524				1	0	0	0	1	1.09524
			157	-0.166667				0	0	0	1	0	-0.166667
			158	0.5				0	0	0	0	1	0.5
			159	1.5				1	0	0	0	1	1.5
			160	-0.212121				0	0	0	1	0	-0.212121
			161	-0.208333				0	0	0	1	0	-0.208333
			162	0.625				0	0	0	0	1	0.625
			163	0.43956				0	0	0	0	1	0.43956
			164	0.9				0	0	0	0	1	0.9
			165	-0.406593				0	0	0	1	1	-0.406593
			166	-0.351648				0	0	0	1	1	-0.351648
			167	0.291667				0	0	0	0	0	0.291667
			168	0.959596				0	0	0	0	1	0.959596
			169	1.5				1	0	0	0	1	1.5
			170	1.5				1	0	0	0	1	1.5
			171	0.676768				0	0	0	0	1	0.676768
			172	-0.777778				0	0	0	1	1	-0.777778
			173	-0.4				0	0	0	1	1	-0.4
			174	2.02198				1	0	0	0	1	2.02198
			175	0.3				0	0	0	0	1	0.3
			176	0.5				0	0	0	0	1	0.5
			177	-0.040404				0	0	0	1	0	-0.040404
			178	1.16162				1	0	0	0	1	1.16162
			179	-0.125				0	0	0	1	0	-0.125
			180	0.384615				0	0	0	0	1	0.384615
			181	0.708333				0	0	0	0	1	0.708333
			182	-0.888889				0	0	0	1	1	-0.888889
			183	-0.333333				0	0	0	1	1	-0.333333
			184	0.858586				0	0	0	0	1	0.858586
			185	0				0	1	1	0	0	0
			186	0.0808081				0	0	0	0	0	0.0808081
			187	0.791209				0	0	0	0	1	0.791209
			188	1.38462				1	0	0	0	1	1.38462
			189	1.68687				1	0	0	0	1	1.68687
			190	0.3				0	0	0	0	1	0.3
			191	-0.47619				0	0	0	1	1	-0.47619
			192	0.5				0	0	0	0	1	0.5
			193	0.616162				0	0	0	0	1	0.616162
			194	-0.833333				0	0	0	1	1	-0.833333
			195	0.0666667				0	0	0	0	0	0.0666667
			196	0.6				0	0	0	0	1	0.6
			197	-0.555556				0	0	0	1	1	-0.555556
			198	1.5				1	0	0	0	1	1.5
			199	-0.161616				0	0	0	1	0	-0.161616
			200	0.5				0	0	0	0	1	0.5
			201	-0.5625				0	0	0	1	1	-0.5625
			202	0.010101				0	0	0	0	0	0.010101
			203	-0.714286				0	0	0	1	1	-0.714286
			204	0.625				0	0	0	0	1	0.625
			205	0				0	1	1	0	0	0
			206	0.416667				0	0	0	0	1	0.416667
			207	0.916667				0	0	0	0	1	0.916667
			208	-0.353535				0	0	0	1	1	-0.353535
			209	-0.888889				0	0	0	1	1	-0.888889
			210	-0.166667				0	0	0	1	0	-0.166667
			211	0.25				0	0	0	0	0	0.25
			212	-0.30303				0	0	0	1	1	-0.30303
			213	0.89899				0	0	0	0	1	0.89899
			214	-0.0833333				0	0	0	1	0	-0.0833333
			215	0.747253				0	0	0	0	1	0.747253
			216	1.54167				1	0	0	0	1	1.54167
			217	0.958333				0	0	0	0	1	0.958333
			218	-0.208333				0	0	0	1	0	-0.208333
			219	-0.171717				0	0	0	1	0	-0.171717
			220	-0.0833333				0	0	0	1	0	-0.0833333
			221	-0.0714286				0	0	0	1	0	-0.0714286
			222	0.040404				0	0	0	0	0	0.040404
			223	0.25				0	0	0	0	0	0.25
			224	-0.0416667				0	0	0	1	0	-0.0416667
			225	1.79121				1	0	0	0	1	1.79121
			226	-0.2				0	0	0	1	0	-0.2
			227	0.111111				0	0	0	0	0	0.111111
			228	-0.0416667				0	0	0	1	0	-0.0416667
			229	1.8				1	0	0	0	1	1.8
			230	0				0	1	1	0	0	0
			231	1.47619				1	0	0	0	1	1.47619
			232	0.583333				0	0	0	0	1	0.583333
			233	1.73737				1	0	0	0	1	1.73737
			234	-1.08791				0	0	0	1	1	-1.08791
			235	0.67033				0	0	0	0	1	0.67033
			236	0.197802				0	0	0	0	0	0.197802
			237	-0.59596				0	0	0	1	1	-0.59596
			238	0.40404				0	0	0	0	1	0.40404
			239	-0.272727				0	0	0	1	0	-0.272727
			240	-0.20202				0	0	0	1	0	-0.20202
			241	0.583333				0	0	0	0	1	0.583333
			242	0.151515				0	0	0	0	0	0.151515
			243	0.969697				0	0	0	0	1	0.969697
			244	-0.452381				0	0	0	1	1	-0.452381
			245	-0.353535				0	0	0	1	1	-0.353535
			246	1.39394				1	0	0	0	1	1.39394
			247	0.151515				0	0	0	0	0	0.151515
			248	-0.0833333				0	0	0	1	0	-0.0833333
			249	0.904762				0	0	0	0	1	0.904762
			250	1.2619				1	0	0	0	1	1.2619
			251	-0.6				0	0	0	1	1	-0.6
			252	1.06061				1	0	0	0	1	1.06061
			253	1.15152				1	0	0	0	1	1.15152
			254	-0.866667				0	0	0	1	1	-0.866667
			255	-0.583333				0	0	0	1	1	-0.583333
			256	0.125				0	0	0	0	0	0.125
			257	0.309524				0	0	0	0	1	0.309524
			258	0.3				0	0	0	0	1	0.3
			259	-0.2				0	0	0	1	0	-0.2
			260	-1.07071				0	0	0	1	1	-1.07071
			261	0.929293				0	0	0	0	1	0.929293
			262	0.818182				0	0	0	0	1	0.818182
			263	0.296703				0	0	0	0	0	0.296703
			264	0.875				0	0	0	0	1	0.875
			265	0.714286				0	0	0	0	1	0.714286
			266	0.1				0	0	0	0	0	0.1
			267	-0.494949				0	0	0	1	1	-0.494949
			268	0.916667				0	0	0	0	1	0.916667
			269	0.75				0	0	0	0	1	0.75
			270	0.787879				0	0	0	0	1	0.787879
			271	-0.119048				0	0	0	1	0	-0.119048
			272	0.10101				0	0	0	0	0	0.10101
			273	-0.171717				0	0	0	1	0	-0.171717
			274	-0.777778				0	0	0	1	1	-0.777778
			275	0.291667				0	0	0	0	0	0.291667
			276	0.3				0	0	0	0	1	0.3
			277	0.363636				0	0	0	0	1	0.363636
			278	1.56044				1	0	0	0	1	1.56044
			279	-0.266667				0	0	0	1	0	-0.266667
			280	-0.166667				0	0	0	1	0	-0.166667
			281	1.875				1	0	0	0	1	1.875
			282	0.5				0	0	0	0	1	0.5
			283	0				0	1	1	0	0	0
			284	1.11905				1	0	0	0	1	1.11905
			285	2.19192				1	0	0	0	1	2.19192
			286	-0.3				0	0	0	1	1	-0.3
			287	0.3				0	0	0	0	1	0.3
			288	0.5				0	0	0	0	1	0.5
			289	1.33333				1	0	0	0	1	1.33333
			290	0				0	1	1	0	0	0
			291	0.333333				0	0	0	0	1	0.333333
			292	-0.351648				0	0	0	1	1	-0.351648
			293	0.333333				0	0	0	0	1	0.333333
			294	1.2				1	0	0	0	1	1.2
			295	-0.383838				0	0	0	1	1	-0.383838
			296	0.692308				0	0	0	0	1	0.692308
			297	-0.047619				0	0	0	1	0	-0.047619
			298	1				0	0	0	0	1	1
			299	-0.606061				0	0	0	1	1	-0.606061
			300	1.08333				1	0	0	0	1	1.08333
			301	-0.616162				0	0	0	1	1	-0.616162
			302	0.416667				0	0	0	0	1	0.416667
			303	-0.626263				0	0	0	1	1	-0.626263
			304	-0.0659341				0	0	0	1	0	-0.0659341
			305	0.333333				0	0	0	0	1	0.333333
			306	0.4				0	0	0	0	1	0.4
			307	0.0416667				0	0	0	0	0	0.0416667
			308	-0.458333				0	0	0	1	1	-0.458333
			309	-0.1				0	0	0	1	0	-0.1
			310	0.846154				0	0	0	0	1	0.846154
			311	0.424242				0	0	0	0	1	0.424242
			312	0.875				0	0	0	0	1	0.875
			313	1.33333				1	0	0	0	1	1.33333
			314	0.9				0	0	0	0	1	0.9
			315	-0.5				0	0	0	1	1	-0.5
			316	0.166667				0	0	0	0	0	0.166667
			317	2.76768				1	0	0	0	1	2.76768
			318	0.666667				0	0	0	0	1	0.666667
			319	-0.161616				0	0	0	1	0	-0.161616
			320	0.2				0	0	0	0	0	0.2
			321	0.989899				0	0	0	0	1	0.989899
			322	0.916667				0	0	0	0	1	0.916667
			323	-0.549451				0	0	0	1	1	-0.549451
			324	-0.166667				0	0	0	1	0	-0.166667
			325	0.505051				0	0	0	0	1	0.505051
			326	0.2				0	0	0	0	0	0.2
			327	-0.171717				0	0	0	1	0	-0.171717
			328	-0.222222				0	0	0	1	0	-0.222222
			329	0.784314				0	0	0	0	1	0.784314
			330	1				0	0	0	0	1	1
			331	-0.2				0	0	0	1	0	-0.2
			332	0.142857				0	0	0	0	0	0.142857
			333	0.296703				0	0	0	0	0	0.296703
			334	-0.212121				0	0	0	1	0	-0.212121
			335	-0.904762				0	0	0	1	1	-0.904762
			336	-0.10101				0	0	0	1	0	-0.10101
			337	1.09091				1	0	0	0	1	1.09091
			338	-0.458333				0	0	0	1	1	-0.458333
			339	1.375				1	0	0	0	1	1.375
			340	0.353535				0	0	0	0	1	0.353535
			341	-0.434343				0	0	0	1	1	-0.434343
			342	-0.454545				0	0	0	1	1	-0.454545
			343	0.69697				0	0	0	0	1	0.69697
			344	-0.125				0	0	0	1	0	-0.125
			345	0.538462				0	0	0	0	1	0.538462
			346	-0.9				0	0	0	1	1	-0.9
			347	-0.1				0	0	0	1	0	-0.1
			348	0.333333				0	0	0	0	1	0.333333
			349	-0.866667				0	0	0	1	1	-0.866667
			350	0.7				0	0	0	0	1	0.7
			351	1.25				1	0	0	0	1	1.25
			352	1.20202				1	0	0	0	1	1.20202
			353	-0.708333				0	0	0	1	1	-0.708333
			354	0.1				0	0	0	0	0	0.1
			355	0.9				0	0	0	0	1	0.9
			356	2.04396				1	0	0	0	1	2.04396
			357	-0.838384				0	0	0	1	1	-0.838384
			358	0.458333				0	0	0	0	1	0.458333
			359	0.414141				0	0	0	0	1	0.414141
			360	-0.263736				0	0	0	1	0	-0.263736
			361	0				0	1	1	0	0	0
			362	0.625				0	0	0	0	1	0.625
			363	-0.175824				0	0	0	1	0	-0.175824
			364	1.2381				1	0	0	0	1	1.2381
			365	0.166667				0	0	0	0	0	0.166667
			366	0.333333				0	0	0	0	1	0.333333
			367	0.333333				0	0	0	0	1	0.333333
			368	-0.282828				0	0	0	1	0	-0.282828
			369	-0.79798				0	0	0	1	1	-0.79798
			370	0.791667				0	0	0	0	1	0.791667
			371	1.34343				1	0	0	0	1	1.34343
			372	0.416667				0	0	0	0	1	0.416667
			373	0.214286				0	0	0	0	0	0.214286
			374	0.0416667				0	0	0	0	0	0.0416667
			375	0.929293				0	0	0	0	1	0.929293
			376	0.416667				0	0	0	0	1	0.416667
			377	0.9				0	0	0	0	1	0.9
			378	-0.380952				0	0	0	1	1	-0.380952
			379	-0.4				0	0	0	1	1	-0.4
			380	0.125				0	0	0	0	0	0.125
			381	0.333333				0	0	0	0	1	0.333333
			382	1.09091				1	0	0	0	1	1.09091
			383	0.757576				0	0	0	0	1	0.757576
			384	-0.32967				0	0	0	1	1	-0.32967
			385	0.428571				0	0	0	0	1	0.428571
			386	0.777778				0	0	0	0	1	0.777778
			387	1.0303				1	0	0	0	1	1.0303
			388	0				0	1	1	0	0	0
			389	0.648352				0	0	0	0	1	0.648352
			390	-0.8				0	0	0	1	1	-0.8
			391	1.1				1	0	0	0	1	1.1
			392	1.1				1	0	0	0	1	1.1
			393	0.2				0	0	0	0	0	0.2
			394	0.242424				0	0	0	0	0	0.242424
			395	0.414141				0	0	0	0	1	0.414141
			396	0.516484				0	0	0	0	1	0.516484
			397	1.33333				1	0	0	0	1	1.33333
			398	1.375				1	0	0	0	1	1.375
			399	-0.4				0	0	0	1	1	-0.4
			400	-0.373626				0	0	0	1	1	-0.373626
			401	-0.25				0	0	0	1	0	-0.25
			402	0.7				0	0	0	0	1	0.7
			403	-1.51648				0	0	0	1	1	-1.51648
			404	0.8				0	0	0	0	1	0.8
			405	-0.690476				0	0	0	1	1	-0.690476
			406	-0.384615				0	0	0	1	1	-0.384615
			407	0.434343				0	0	0	0	1	0.434343
			408	1.7				1	0	0	0	1	1.7
			409	-0.939394				0	0	0	1	1	-0.939394
			410	0.1				0	0	0	0	0	0.1
			411	-0.043956				0	0	0	1	0	-0.043956
			412	-0.583333				0	0	0	1	1	-0.583333
			413	0.901099				0	0	0	0	1	0.901099
			414	0.4				0	0	0	0	1	0.4
			415	1.19192				1	0	0	0	1	1.19192
			416	0.939394				0	0	0	0	1	0.939394
			417	-0.535354				0	0	0	1	1	-0.535354
			418	-0.0833333				0	0	0	1	0	-0.0833333
			419	-0.416667				0	0	0	1	1	-0.416667
			420	0.30303				0	0	0	0	1	0.30303
			421	-0.666667				0	0	0	1	1	-0.666667
			422	-0.9				0	0	0	1	1	-0.9
			423	-1				0	0	0	1	1	-1
			424	0.0625				0	0	0	0	0	0.0625
			425	0.888889				0	0	0	0	1	0.888889
			426	0.424242				0	0	0	0	1	0.424242
			427	1.52525				1	0	0	0	1	1.52525
			428	0.549451				0	0	0	0	1	0.549451
			429	0.858586				0	0	0	0	1	0.858586
			430	0.7				0	0	0	0	1	0.7
			431	-0.164835				0	0	0	1	0	-0.164835
			432	-0.040404				0	0	0	1	0	-0.040404
			433	0.636364				0	0	0	0	1	0.636364
			434	1.52525				1	0	0	0	1	1.52525
			435	0.0909091				0	0	0	0	0	0.0909091
			436	0.8				0	0	0	0	1	0.8
			437	0.767677				0	0	0	0	1	0.767677
			438	0.020202				0	0	0	0	0	0.020202
			439	-0.040404				0	0	0	1	0	-0.040404
			440	0.69697				0	0	0	0	1	0.69697
			441	0.541667				0	0	0	0	1	0.541667
			442	0.1				0	0	0	0	0	0.1
			443	1.375				1	0	0	0	1	1.375
			444	0.5				0	0	0	0	1	0.5
			445	0.291667				0	0	0	0	0	0.291667
			446	0.282828				0	0	0	0	0	0.282828
			447	-0.5				0	0	0	1	1	-0.5
			448	-0.549451				0	0	0	1	1	-0.549451
			449	0.25				0	0	0	0	0	0.25
			450	-0.25				0	0	0	1	0	-0.25
			451	0.3				0	0	0	0	1	0.3
			452	0				0	1	1	0	0	0
			453	0.383838				0	0	0	0	1	0.383838
			454	-0.6				0	0	0	1	1	-0.6
			455	-0.0808081				0	0	0	1	0	-0.0808081
			456	0.875				0	0	0	0	1	0.875
			457	0.40404				0	0	0	0	1	0.40404
			458	-0.292929				0	0	0	1	0	-0.292929
			459	0.8				0	0	0	0	1	0.8
			460	-1.25				0	0	0	1	1	-1.25
			461	-0.232323				0	0	0	1	0	-0.232323
			462	0.833333				0	0	0	0	1	0.833333
			463	1.3				1	0	0	0	1	1.3
			464	0				0	1	1	0	0	0
			465	-0.933333				0	0	0	1	1	-0.933333
			466	1.92308				1	0	0	0	1	1.92308
			467	1.02381				1	0	0	0	1	1.02381
			468	-0.0909091				0	0	0	1	0	-0.0909091
			469	-0.0707071				0	0	0	1	0	-0.0707071
			470	-0.733333				0	0	0	1	1	-0.733333
			471	-0.733333				0	0	0	1	1	-0.733333
			472	0.212121				0	0	0	0	0	0.212121
			473	-0.56044				0	0	0	1	1	-0.56044
			474	0.186813				0	0	0	0	0	0.186813
			475	0.690476				0	0	0	0	1	0.690476
			476	0.20202				0	0	0	0	0	0.20202
			477	-0.636364				0	0	0	1	1	-0.636364
			478	-1.375				0	0	0	1	1	-1.375
			479	0.0833333				0	0	0	0	0	0.0833333
			480	-1.13131				0	0	0	1	1	-1.13131
			481	-0.0416667				0	0	0	1	0	-0.0416667
			482	0.59596				0	0	0	0	1	0.59596
			483	-0.393939				0	0	0	1	1	-0.393939
			484	0.7				0	0	0	0	1	0.7
			485	-0.125				0	0	0	1	0	-0.125
			486	1.08081				1	0	0	0	1	1.08081
			487	-0.120879				0	0	0	1	0	-0.120879
			488	0.285714				0	0	0	0	0	0.285714
			489	-0.708333				0	0	0	1	1	-0.708333
			490	1.12121				1	0	0	0	1	1.12121
			491	0.928571				0	0	0	0	1	0.928571
			492	-0.59596				0	0	0	1	1	-0.59596
			493	0.5				0	0	0	0	1	0.5
			494	0.2				0	0	0	0	0	0.2
			495	0.190476				0	0	0	0	0	0.190476
			496	0.010101				0	0	0	0	0	0.010101
			497	0.21978				0	0	0	0	0	0.21978
			498	0.466667				0	0	0	0	1	0.466667
			499	0				0	1	1	0	0	0
			500	-0.666667				0	0	0	1	1	-0.666667
			501	-0.0549451				0	0	0	1	0	-0.0549451
			502	0.3				0	0	0	0	1	0.3
			503	1.16667				1	0	0	0	1	1.16667
			504	-0.3				0	0	0	1	1	-0.3
			505	0.757576				0	0	0	0	1	0.757576
			506	-0.808081				0	0	0	1	1	-0.808081
			507	0.505051				0	0	0	0	1	0.505051
			508	-0.958333				0	0	0	1	1	-0.958333
			509	0.967033				0	0	0	0	1	0.967033
			510	0.230769				0	0	0	0	0	0.230769
			511	-0.575758				0	0	0	1	1	-0.575758
			512	0.43956				0	0	0	0	1	0.43956
			513	1.54545				1	0	0	0	1	1.54545
			514	0.3				0	0	0	0	1	0.3
			515	0.208333				0	0	0	0	0	0.208333
			516	0.808081				0	0	0	0	1	0.808081
			517	-0.119048				0	0	0	1	0	-0.119048
			518	0				0	1	1	0	0	0
			519	-0.375				0	0	0	1	1	-0.375
			520	1.36364				1	0	0	0	1	1.36364
			521	0.666667				0	0	0	0	1	0.666667
			522	0.5				0	0	0	0	1	0.5
			523	0.1				0	0	0	0	0	0.1
			524	2.625				1	0	0	0	1	2.625
			525	-0.010989				0	0	0	1	0	-0.010989
			526	0.282828				0	0	0	0	0	0.282828
			527	0.666667				0	0	0	0	1	0.666667
			528	-1.09091				0	0	0	1	1	-1.09091
			529	-0.141414				0	0	0	1	0	-0.141414
			530	-0.166667				0	0	0	1	0	-0.166667
			531	0.69697				0	0	0	0	1	0.69697
			532	0.582418				0	0	0	0	1	0.582418
			533	0.313131				0	0	0	0	1	0.313131
			534	0.666667				0	0	0	0	1	0.666667
			535	1.42857				1	0	0	0	1	1.42857
			536	0.791667				0	0	0	0	1	0.791667
			537	-0.313131				0	0	0	1	1	-0.313131
			538	0.7				0	0	0	0	1	0.7
			539	0.878788				0	0	0	0	1	0.878788
			540	0.318681				0	0	0	0	1	0.318681
			541	-0.516484				0	0	0	1	1	-0.516484
			542	2.33333				1	0	0	0	1	2.33333
			543	0.535354				0	0	0	0	1	0.535354
			544	0.171717				0	0	0	0	0	0.171717
			545	-0.515152				0	0	0	1	1	-0.515152
			546	-1.06061				0	0	0	1	1	-1.06061
			547	0.291667				0	0	0	0	0	0.291667
			548	-0.020202				0	0	0	1	0	-0.020202
			549	-0.291667				0	0	0	1	0	-0.291667
			550	-0.252525				0	0	0	1	0	-0.252525
			551	-0.131868				0	0	0	1	0	-0.131868
			552	0.0808081				0	0	0	0	0	0.0808081
			553	1.09091				1	0	0	0	1	1.09091
			554	0.020202				0	0	0	0	0	0.020202
			555	0.343434				0	0	0	0	1	0.343434
			556	1.125				1	0	0	0	1	1.125
			557	0.393939				0	0	0	0	1	0.393939
			558	0.738095				0	0	0	0	1	0.738095
			559	0.637363				0	0	0	0	1	0.637363
			560	1.5				1	0	0	0	1	1.5
			561	-1.2381				0	0	0	1	1	-1.2381
			562	-0.119048				0	0	0	1	0	-0.119048
			563	-0.4				0	0	0	1	1	-0.4
			564	0.8				0	0	0	0	1	0.8
			565	-0.8				0	0	0	1	1	-0.8
			566	0.166667				0	0	0	0	0	0.166667
			567	0.656566				0	0	0	0	1	0.656566
			568	0.333333				0	0	0	0	1	0.333333
			569	0.868687				0	0	0	0	1	0.868687
			570	0.6				0	0	0	0	1	0.6
			571	1.06061				1	0	0	0	1	1.06061
			572	0.30303				0	0	0	0	1	0.30303
			573	1.16162				1	0	0	0	1	1.16162
			574	0.59596				0	0	0	0	1	0.59596
			575	-0.252525				0	0	0	1	0	-0.252525
			576	0.8				0	0	0	0	1	0.8
			577	-0.2				0	0	0	1	0	-0.2
			578	-0.2				0	0	0	1	0	-0.2
			579	1.01099				1	0	0	0	1	1.01099
			580	0.313131				0	0	0	0	1	0.313131
			581	0.583333				0	0	0	0	1	0.583333
			582	-0.262626				0	0	0	1	0	-0.262626
			583	0.69697				0	0	0	0	1	0.69697
			584	0.282828				0	0	0	0	0	0.282828
			585	0.6				0	0	0	0	1	0.6
			586	0.190476				0	0	0	0	0	0.190476
			587	0.676768				0	0	0	0	1	0.676768
			588	0.404762				0	0	0	0	1	0.404762
			589	1.02198				1	0	0	0	1	1.02198
			590	0.659341				0	0	0	0	1	0.659341
			591	0.232323				0	0	0	0	0	0.232323
			592	-0.616162				0	0	0	1	1	-0.616162
			593	-0.565657				0	0	0	1	1	-0.565657
			594	-0.878788				0	0	0	1	1	-0.878788
			595	-0.171717				0	0	0	1	0	-0.171717
			596	-0.583333				0	0	0	1	1	-0.583333
			597	-0.939394				0	0	0	1	1	-0.939394
			598	-0.1				0	0	0	1	0	-0.1
			599	-0.434343				0	0	0	1	1	-0.434343
			600	-0.979798				0	0	0	1	1	-0.979798
			601	-0.25				0	0	0	1	0	-0.25
			602	0.5				0	0	0	0	1	0.5
			603	-0.666667				0	0	0	1	1	-0.666667
			604	0.292929				0	0	0	0	0	0.292929
			605	0.0808081				0	0	0	0	0	0.0808081
			606	0.733333				0	0	0	0	1	0.733333
			607	-0.5				0	0	0	1	1	-0.5
			608	1.16667				1	0	0	0	1	1.16667
			609	0.285714				0	0	0	0	0	0.285714
			610	0.047619				0	0	0	0	0	0.047619
			611	-0.541667				0	0	0	1	1	-0.541667
			612	0.5				0	0	0	0	1	0.5
			613	0.857143				0	0	0	0	1	0.857143
			614	-0.291667				0	0	0	1	0	-0.291667
			615	0.414141				0	0	0	0	1	0.414141
			616	0.461538				0	0	0	0	1	0.461538
			617	-0.967033				0	0	0	1	1	-0.967033
			618	0.777778				0	0	0	0	1	0.777778
			619	0.262626				0	0	0	0	0	0.262626
			620	0.292929				0	0	0	0	0	0.292929
			621	0.9				0	0	0	0	1	0.9
			622	0.454545				0	0	0	0	1	0.454545
			623	-0.375				0	0	0	1	1	-0.375
			624	0.375				0	0	0	0	1	0.375
			625	0.5				0	0	0	0	1	0.5
			626	1.71717				1	0	0	0	1	1.71717
			627	-0.0606061				0	0	0	1	0	-0.0606061
			628	-0.125				0	0	0	1	0	-0.125
			629	0				0	1	1	0	0	0
			630	0.3				0	0	0	0	1	0.3
			631	-0.285714				0	0	0	1	0	-0.285714
			632	0.166667				0	0	0	0	0	0.166667
			633	0.1				0	0	0	0	0	0.1
			634	0.0659341				0	0	0	0	0	0.0659341
			635	0.353535				0	0	0	0	1	0.353535
			636	0.541667				0	0	0	0	1	0.541667
			637	0.2				0	0	0	0	0	0.2
			638	-0.252525				0	0	0	1	0	-0.252525
			639	0.2				0	0	0	0	0	0.2
			640	0.43956				0	0	0	0	1	0.43956
			641	-0.161616				0	0	0	1	0	-0.161616
			642	0.424242				0	0	0	0	1	0.424242
			643	1.56566				1	0	0	0	1	1.56566
			644	-0.666667				0	0	0	1	1	-0.666667
			645	0.901099				0	0	0	0	1	0.901099
			646	0.636364				0	0	0	0	1	0.636364
			647	-1.125				0	0	0	1	1	-1.125
			648	0.626263				0	0	0	0	1	0.626263
			649	-0.151515				0	0	0	1	0	-0.151515
			650	-0.484848				0	0	0	1	1	-0.484848
			651	-0.4				0	0	0	1	1	-0.4
			652	1				0	0	0	0	1	1
			653	0.450549				0	0	0	0	1	0.450549
			654	0.474747				0	0	0	0	1	0.474747
			655	-1.05495				0	0	0	1	1	-1.05495
			656	-0.333333				0	0	0	1	1	-0.333333
			657	0.0909091				0	0	0	0	0	0.0909091
			658	0.626263				0	0	0	0	1	0.626263
			659	0.166667				0	0	0	0	0	0.166667
			660	-0.131313				0	0	0	1	0	-0.131313
			661	0.6				0	0	0	0	1	0.6
			662	0.7				0	0	0	0	1	0.7
			663	0.912088				0	0	0	0	1	0.912088
			664	-0.583333				0	0	0	1	1	-0.583333
			665	-0.0606061				0	0	0	1	0	-0.0606061
			666	1.36364				1	0	0	0	1	1.36364
			667	0.5				0	0	0	0	1	0.5
			668	0.375				0	0	0	0	1	0.375
			669	-1.06593				0	0	0	1	1	-1.06593
			670	0.747475				0	0	0	0	1	0.747475
			671	0.777778				0	0	0	0	1	0.777778
			672	-0.912088				0	0	0	1	1	-0.912088
			673	-0.0238095				0	0	0	1	0	-0.0238095
			674	1.40476				1	0	0	0	1	1.40476
			675	0.761905				0	0	0	0	1	0.761905
			676	1.5				1	0	0	0	1	1.5
			677	0.292929				0	0	0	0	0	0.292929
			678	-0.0714286				0	0	0	1	0	-0.0714286
			679	-0.133333				0	0	0	1	0	-0.133333
			680	0.4				0	0	0	0	1	0.4
			681	0.375				0	0	0	0	1	0.375
			682	1.47475				1	0	0	0	1	1.47475
			683	0.238095				0	0	0	0	0	0.238095
			684	-0.5				0	0	0	1	1	-0.5
			685	-0.353535				0	0	0	1	1	-0.353535
			686	2.08333				1	0	0	0	1	2.08333
			687	0.0606061				0	0	0	0	0	0.0606061
			688	-0.5				0	0	0	1	1	-0.5
			689	0.111111				0	0	0	0	0	0.111111
			690	0.5				0	0	0	0	1	0.5
			691	0.969697				0	0	0	0	1	0.969697
			692	-0.151515				0	0	0	1	0	-0.151515
			693	0.5				0	0	0	0	1	0.5
			694	0.444444				0	0	0	0	1	0.444444
			695	0.291667				0	0	0	0	0	0.291667
			696	-0.030303				0	0	0	1	0	-0.030303
			697	1.16667				1	0	0	0	1	1.16667
			698	0.969697				0	0	0	0	1	0.969697
			699	1.1				1	0	0	0	1	1.1
			700	0.666667				0	0	0	0	1	0.666667
			701	-0.208333				0	0	0	1	0	-0.208333
			702	0.010101				0	0	0	0	0	0.010101
			703	0.6				0	0	0	0	1	0.6
			704	0.166667				0	0	0	0	0	0.166667
			705	0				0	1	1	0	0	0
			706	0.813187				0	0	0	0	1	0.813187
			707	0.7				0	0	0	0	1	0.7
			708	1.70833				1	0	0	0	1	1.70833
			709	1.54167				1	0	0	0	1	1.54167
			710	-0.888889				0	0	0	1	1	-0.888889
			711	0.535354				0	0	0	0	1	0.535354
			712	0.25				0	0	0	0	0	0.25
			713	1				0	0	0	0	1	1
			714	0.125				0	0	0	0	0	0.125
			715	-0.707071				0	0	0	1	1	-0.707071
			716	-0.958333				0	0	0	1	1	-0.958333
			717	0.538462				0	0	0	0	1	0.538462
			718	-0.0833333				0	0	0	1	0	-0.0833333
			719	1.1				1	0	0	0	1	1.1
			720	-0.969697				0	0	0	1	1	-0.969697
			721	-0.916667				0	0	0	1	1	-0.916667
			722	-0.323232				0	0	0	1	1	-0.323232
			723	0.121212				0	0	0	0	0	0.121212
			724	-0.323232				0	0	0	1	1	-0.323232
			725	-0.393939				0	0	0	1	1	-0.393939
			726	0.323232				0	0	0	0	1	0.323232
			727	0.212121				0	0	0	0	0	0.212121
			728	0.916667				0	0	0	0	1	0.916667
			729	0.020202				0	0	0	0	0	0.020202
			730	-0.767677				0	0	0	1	1	-0.767677
			731	0.880952				0	0	0	0	1	0.880952
			732	0.75				0	0	0	0	1	0.75
			733	1.79121				1	0	0	0	1	1.79121
			734	0.166667				0	0	0	0	0	0.166667
			735	0.6				0	0	0	0	1	0.6
			736	0.8				0	0	0	0	1	0.8
			737	-0.454545				0	0	0	1	1	-0.454545
			738	0				0	1	1	0	0	0
			739	-0.406593				0	0	0	1	1	-0.406593
			740	0.2				0	0	0	0	0	0.2
			741	0.585859				0	0	0	0	1	0.585859
			742	1.05051				1	0	0	0	1	1.05051
			743	-0.3				0	0	0	1	1	-0.3
			744	-0.6				0	0	0	1	1	-0.6
			745	0.59596				0	0	0	0	1	0.59596
			746	-0.0416667				0	0	0	1	0	-0.0416667
			747	-0.40404				0	0	0	1	1	-0.40404
			748	-0.0505051				0	0	0	1	0	-0.0505051
			749	-0.375				0	0	0	1	1	-0.375
			750	0.541667				0	0	0	0	1	0.541667
			751	1.33333				1	0	0	0	1	1.33333
			752	0.875				0	0	0	0	1	0.875
			753	-0.151515				0	0	0	1	0	-0.151515
			754	0.5				0	0	0	0	1	0.5
			755	-0.333333				0	0	0	1	1	-0.333333
			756	0				0	1	1	0	0	0
			757	-0.67033				0	0	0	1	1	-0.67033
			758	0.545455				0	0	0	0	1	0.545455
			759	-0.20202				0	0	0	1	0	-0.20202
			760	-0.666667				0	0	0	1	1	-0.666667
			761	1				0	0	0	0	1	1
			762	1.19192				1	0	0	0	1	1.19192
			763	0.6				0	0	0	0	1	0.6
			764	-0.4				0	0	0	1	1	-0.4
			765	0.383838				0	0	0	0	1	0.383838
			766	0.296703				0	0	0	0	0	0.296703
			767	1.26667				1	0	0	0	1	1.26667
			768	1.02198				1	0	0	0	1	1.02198
			769	1.03297				1	0	0	0	1	1.03297
			770	0.959596				0	0	0	0	1	0.959596
			771	1.91209				1	0	0	0	1	1.91209
			772	0.4				0	0	0	0	1	0.4
			773	-1.19048				0	0	0	1	1	-1.19048
			774	0.0659341				0	0	0	0	0	0.0659341
			775	0.714286				0	0	0	0	1	0.714286
			776	0.424242				0	0	0	0	1	0.424242
			777	0.20202				0	0	0	0	0	0.20202
			778	-0.593407				0	0	0	1	1	-0.593407
			779	0.547619				0	0	0	0	1	0.547619
			780	0.549451				0	0	0	0	1	0.549451
			781	1.375				1	0	0	0	1	1.375
			782	-0.444444				0	0	0	1	1	-0.444444
			783	0.959596				0	0	0	0	1	0.959596
			784	1.35354				1	0	0	0	1	1.35354
			785	-0.0606061				0	0	0	1	0	-0.0606061
			786	0.848485				0	0	0	0	1	0.848485
			787	1.04167				1	0	0	0	1	1.04167
			788	-0.1875				0	0	0	1	0	-0.1875
			789	1.79167				1	0	0	0	1	1.79167
			790	0.527473				0	0	0	0	1	0.527473
			791	-0.151515				0	0	0	1	0	-0.151515
			792	0				0	1	1	0	0	0
			793	-1.04167				0	0	0	1	1	-1.04167
			794	0.4				0	0	0	0	1	0.4
			795	0.262626				0	0	0	0	0	0.262626
			796	1.14286				1	0	0	0	1	1.14286
			797	0.666667				0	0	0	0	1	0.666667
			798	0.252525				0	0	0	0	0	0.252525
			799	0.125				0	0	0	0	0	0.125
			800	-0.0416667				0	0	0	1	0	-0.0416667
			801	-0.25				0	0	0	1	0	-0.25
			802	-0.2				0	0	0	1	0	-0.2
			803	0.626263				0	0	0	0	1	0.626263
			804	0.472527				0	0	0	0	1	0.472527
			805	1.4				1	0	0	0	1	1.4
			806	0				0	1	1	0	0	0
			807	0.1				0	0	0	0	0	0.1
			808	-0.1				0	0	0	1	0	-0.1
			809	-0.450549				0	0	0	1	1	-0.450549
			810	0.414141				0	0	0	0	1	0.414141
			811	-0.828283				0	0	0	1	1	-0.828283
			812	-0.538462				0	0	0	1	1	-0.538462
			813	-0.464646				0	0	0	1	1	-0.464646
			814	0.32967				0	0	0	0	1	0.32967
			815	0.6				0	0	0	0	1	0.6
			816	0.757576				0	0	0	0	1	0.757576
			817	0.208333				0	0	0	0	0	0.208333
			818	-0.318681				0	0	0	1	1	-0.318681
			819	-0.6				0	0	0	1	1	-0.6
			820	0.875				0	0	0	0	1	0.875
			821	-0.212121				0	0	0	1	0	-0.212121
			822	0.131313				0	0	0	0	0	0.131313
			823	0.0606061				0	0	0	0	0	0.0606061
			824	0.0238095				0	0	0	0	0	0.0238095
			825	0.125				0	0	0	0	0	0.125
			826	2.29167				1	0	0	0	1	2.29167
			827	-0.111111				0	0	0	1	0	-0.111111
			828	0.916667				0	0	0	0	1	0.916667
			829	0.868132				0	0	0	0	1	0.868132
			830	0.6				0	0	0	0	1	0.6
			831	-1.6				0	0	0	1	1	-1.6
			832	0.3				0	0	0	0	1	0.3
			833	1.125				1	0	0	0	1	1.125
			834	0.395604				0	0	0	0	1	0.395604
			835	1.32323				1	0	0	0	1	1.32323
			836	0.606061				0	0	0	0	1	0.606061
			837	-0.0714286				0	0	0	1	0	-0.0714286
			838	0.666667				0	0	0	0	1	0.666667
			839	-0.125				0	0	0	1	0	-0.125
			840	0.541667				0	0	0	0	1	0.541667
			841	1.375				1	0	0	0	1	1.375
			842	-0.416667				0	0	0	1	1	-0.416667
			843	0.3				0	0	0	0	1	0.3
			844	-0.59596				0	0	0	1	1	-0.59596
			845	0.416667				0	0	0	0	1	0.416667
			846	0.232323				0	0	0	0	0	0.232323
			847	1.12088				1	0	0	0	1	1.12088
			848	0.384615				0	0	0	0	1	0.384615
			849	0.141414				0	0	0	0	0	0.141414
			850	0.4				0	0	0	0	1	0.4
			851	-0.659341				0	0	0	1	1	-0.659341
			852	0.1				0	0	0	0	0	0.1
			853	-0.707071				0	0	0	1	1	-0.707071
			854	0.6				0	0	0	0	1	0.6
			855	0.733333				0	0	0	0	1	0.733333
			856	0.6				0	0	0	0	1	0.6
			857	0.5				0	0	0	0	1	0.5
			858	0.309524				0	0	0	0	1	0.309524
			859	0.375				0	0	0	0	1	0.375
			860	1.4				1	0	0	0	1	1.4
			861	-0.375				0	0	0	1	1	-0.375
			862	1.66667				1	0	0	0	1	1.66667
			863	0.1				0	0	0	0	0	0.1
			864	-0.452381				0	0	0	1	1	-0.452381
			865	0.666667				0	0	0	0	1	0.666667
			866	0.958333				0	0	0	0	1	0.958333
			867	0.232323				0	0	0	0	0	0.232323
			868	0.4				0	0	0	0	1	0.4
			869	0.3				0	0	0	0	1	0.3
			870	1.44444				1	0	0	0	1	1.44444
			871	0.4				0	0	0	0	1	0.4
			872	0.151515				0	0	0	0	0	0.151515
			873	-1				0	0	0	1	1	-1
			874	-0.67033				0	0	0	1	1	-0.67033
			875	0.833333				0	0	0	0	1	0.833333
			876	1				0	0	0	0	1	1
			877	1.10101				1	0	0	0	1	1.10101
			878	1.6				1	0	0	0	1	1.6
			879	0.291667				0	0	0	0	0	0.291667
			880	1.11111				1	0	0	0	1	1.11111
			881	1.04167				1	0	0	0	1	1.04167
			882	0.4				0	0	0	0	1	0.4
			883	1.02381				1	0	0	0	1	1.02381
			884	0.232323				0	0	0	0	0	0.232323
			885	0.7				0	0	0	0	1	0.7
			886	-0.232323				0	0	0	1	0	-0.232323
			887	1.6				1	0	0	0	1	1.6
			888	0.583333				0	0	0	0	1	0.583333
			889	-0.59596				0	0	0	1	1	-0.59596
			890	0.757576				0	0	0	0	1	0.757576
			891	0.333333				0	0	0	0	1	0.333333
			892	0.833333				0	0	0	0	1	0.833333
			893	0.333333				0	0	0	0	1	0.333333
			894	-0.3				0	0	0	1	1	-0.3
			895	0.25				0	0	0	0	0	0.25
			896	-0.242424				0	0	0	1	0	-0.242424
			897	1				0	0	0	0	1	1
			898	0.625				0	0	0	0	1	0.625
			899	-0.703297				0	0	0	1	1	-0.703297
			900	0.625				0	0	0	0	1	0.625
			901	-0.7				0	0	0	1	1	-0.7
			902	0.928571				0	0	0	0	1	0.928571
			903	-0.40404				0	0	0	1	1	-0.40404
			904	-0.958333				0	0	0	1	1	-0.958333
			905	-0.9				0	0	0	1	1	-0.9
			906	-0.0549451				0	0	0	1	0	-0.0549451
			907	0.6				0	0	0	0	1	0.6
			908	-1.1978				0	0	0	1	1	-1.1978
			909	0.30303				0	0	0	0	1	0.30303
			910	-0.989899				0	0	0	1	1	-0.989899
			911	-0.131313				0	0	0	1	0	-0.131313
			912	0.333333				0	0	0	0	1	0.333333
			913	0.1				0	0	0	0	0	0.1
			914	0.575758				0	0	0	0	1	0.575758
			915	-1.18182				0	0	0	1	1	-1.18182
			916	1.58586				1	0	0	0	1	1.58586
			917	1				0	0	0	0	1	1
			918	0.979798				0	0	0	0	1	0.979798
			919	-0.878788				0	0	0	1	1	-0.878788
			920	0.383838				0	0	0	0	1	0.383838
			921	1.08333				1	0	0	0	1	1.08333
			922	0.010989				0	0	0	0	0	0.010989
			923	0.4				0	0	0	0	1	0.4
			924	0.434343				0	0	0	0	1	0.434343
			925	-0.40404				0	0	0	1	1	-0.40404
			926	1.26263				1	0	0	0	1	1.26263
			927	0.285714				0	0	0	0	0	0.285714
			928	0.4				0	0	0	0	1	0.4
			929	1.79167				1	0	0	0	1	1.79167
			930	-0.208333				0	0	0	1	0	-0.208333
			931	0.833333				0	0	0	0	1	0.833333
			932	-0.708333				0	0	0	1	1	-0.708333
			933	-0.40404				0	0	0	1	1	-0.40404
			934	-0.888889				0	0	0	1	1	-0.888889
			935	0.616162				0	0	0	0	1	0.616162
			936	0.343434				0	0	0	0	1	0.343434
			937	-0.333333				0	0	0	1	1	-0.333333
			938	1.08791				1	0	0	0	1	1.08791
			939	0.417582				0	0	0	0	1	0.417582
			940	0.458333				0	0	0	0	1	0.458333
			941	0.292929				0	0	0	0	0	0.292929
			942	1.6				1	0	0	0	1	1.6
			943	0.666667				0	0	0	0	1	0.666667
			944	1.13131				1	0	0	0	1	1.13131
			945	1.25253				1	0	0	0	1	1.25253
			946	0.7				0	0	0	0	1	0.7
			947	1.0101				1	0	0	0	1	1.0101
			948	-0.79798				0	0	0	1	1	-0.79798
			949	-0.2				0	0	0	1	0	-0.2
			950	0.375				0	0	0	0	1	0.375
			951	1.3				1	0	0	0	1	1.3
			952	0.030303				0	0	0	0	0	0.030303
			953	1.15152				1	0	0	0	1	1.15152
			954	0.373737				0	0	0	0	1	0.373737
			955	0.414141				0	0	0	0	1	0.414141
			956	-1.33333				0	0	0	1	1	-1.33333
			957	-0.838384				0	0	0	1	1	-0.838384
			958	-1.31313				0	0	0	1	1	-1.31313
			959	0.761905				0	0	0	0	1	0.761905
			960	0.585859				0	0	0	0	1	0.585859
			961	1.41667				1	0	0	0	1	1.41667
			962	-1.13333				0	0	0	1	1	-1.13333
			963	0.333333				0	0	0	0	1	0.333333
			964	0.1				0	0	0	0	0	0.1
			965	-0.0549451				0	0	0	1	0	-0.0549451
			966	0				0	1	1	0	0	0
			967	1.2				1	0	0	0	1	1.2
			968	0.131313				0	0	0	0	0	0.131313
			969	0.333333				0	0	0	0	1	0.333333
			970	1				0	0	0	0	1	1
			971	-0.428571				0	0	0	1	1	-0.428571
			972	0.585859				0	0	0	0	1	0.585859
			973	-0.2				0	0	0	1	0	-0.2
			974	0.010101				0	0	0	0	0	0.010101
			975	-0.0606061				0	0	0	1	0	-0.0606061
			976	0.375				0	0	0	0	1	0.375
			977	0.979798				0	0	0	0	1	0.979798
			978	1.54167				1	0	0	0	1	1.54167
			979	-1.04167				0	0	0	1	1	-1.04167
			980	1.65657				1	0	0	0	1	1.65657
			981	1				0	0	0	0	1	1
			982	1				0	0	0	0	1	1
			983	0.583333				0	0	0	0	1	0.583333
			984	0.6				0	0	0	0	1	0.6
			985	0.676768				0	0	0	0	1	0.676768
			986	-0.181818				0	0	0	1	0	-0.181818
			987	-1.01099				0	0	0	1	1	-1.01099
			988	0.767677				0	0	0	0	1	0.767677
			989	0.969697				0	0	0	0	1	0.969697
			990	-0.989011				0	0	0	1	1	-0.989011
			991	0.10989				0	0	0	0	0	0.10989
			992	-0.380952				0	0	0	1	1	-0.380952
			993	0.541667				0	0	0	0	1	0.541667
			994	-0.2				0	0	0	1	0	-0.2
			995	-0.7				0	0	0	1	1	-0.7
			996	1.48485				1	0	0	0	1	1.48485
			997	0.747475				0	0	0	0	1	0.747475
			998	0.78022				0	0	0	0	1	0.78022
			999	-0.353535				0	0	0	1	1	-0.353535
			1000	1.6				1	0	0	0	1	1.6

## Sheet: Hypothesis test
	Hypothesis testing - to check whether a "null" hypothesis is consistent with the data
	The (fictional) data in the Sample sheet (tab at the bottom) gives Wellbeing scores for a random sample of 20 people, and whether they are vegetarians or not. The mean of the vegetarian score is 10 more than the omnivores (non-vegetarians). But perhaps this is just a fluke; with another 20 people the omnivores might do better? To find out how likely this is click on the Single resample tab. The s…
	This 23.3% is called the p value or significance level. It is simply the proportion of the resamples in the pink column which are 10 or more or -10 or less: in my case 233 of them. (If you want to check this quickly set the number of resamples to 20.) In the diagram on the right, if you imagine vertical lines at 10 and -10, the proportion in the "tails" is 23.3%.
	The p value gives a measure of the plausibility of the null hypothesis that there is no difference between the means of the underlying populations. The lower the p value, the less plausible the null hypothesis of no difference is, and so the stronger the evidence for a real difference. If you edit the sample to make the evidence stronger - perhaps make numbers in the vegetarian group bigger, and …
	Imagine now that wellness is assessed on a two point scale: 1 means well, 0 means not well. Exactly the same method will work, remembering that the mean is now the proportion of well people (e.g. If 6 of the 9 vegetarians were well, the proportion well is 2/3 or 0.667 which is the same as the mean of 6 ones and 3 zeros). Alternatively imagine that vegetarianism is measured on a sliding scale (per…
	This "randomisation test" is very flexible. It will do the job of the following conventional tests: t test for the difference of two means from independent samples, a test of a correlation coefficient, a test of the difference of two proportions (or a 2x2 chi square test), and several other possibilities if you want to analyse other statistics (see Tweaks in the Introduction sheet).

## Sheet: Bootstrap
	Bootstrapping is a way of recycling data from a sample to make inferences which go beyond the sample.
	What's the likely error in estimating the mean wellness score from a sample of 9 vegetarians? In the Sample sheet, delete the 11 rows of non-vegetarian (omnivore) data, click on the orange cell and set the drop-down menu to Mean of first column. Then, in the Single resample sheet, set the left hand orange cell menu to WITH replacement (first column only). In the Lots of resamples sheet, leave the…
	Now go to the Single resample sheet, and press F9 a few times you should see the column of numbers changing. This is the resampling, and because each number is replaced after it has been chosen, each selection is made with a 1 in 9 (11.1%) chance of choosing 74, a 1 in 9 chance of choosing 65, and so on. This means that some numbers are likely to appear more than once, and some won't appear at al…
	If you now click on the Lots of resamples tab you will see what happens if you do this 1000 times. Scroll down the pink cells to see the means of these 1000 resamples. When I did it there were 82 centred on 54 (as each column is 2 wide this means between 53 and 55) like the resample described above: I've pasted the diagram on the right. (When you do it it will obviously be a bit different because…
	Resampling with replacement like this is a way of seeing what will happen with samples of 9 if the whole population of vegetarians exactly mirrors the sample of 9 we've actually got: one ninth 74s, one ninth 65, and so on. The difficulty, of course, is that this is almost certainly not true - the whole problem is we don't know the pattern in the whole population. However this diagram does tell us…
	This means that the histogram can be regarded as telling us the probability of each possible population mean. There is, for example, virtually no chance that the population means will be more than 80 or less than 40, about a 5% chance that it will be less than 50 (put 50 in the bottom green cell), and a 95% chance that the population means will be between about 48 and 72.
	You can do a lot more with this idea. Instead of a mean you might be working with the difference of two means (see Introduction) or proportions, or a correlation coefficient. Or you might be interesting in what happens with a larger sample - click on the right hand orange button in the Single resample sheet and try, for example, a resample of 100. Bootstrapping is almost too convincing: it's easy…

## Sheet: Probability
	Probability distributions
	How many girls and boys are likely in families of eight? Assuming that the probability of each sex is a half (50%), there are formulae in the textbooks and in Excel which will work out the answer (it's the binomial distribution). Alternatively you can use computer simulation: just produce lots and lots of families of eight, and see how many of them have 0 girls, 1 girl, 2 girls, etc.
	To use this spreadsheet, delete the data in the green cells in the Sample sheet, and the headings in the yellow cells. Put 1 and 0 in the first two cells of the left hand column and put Girls as the heading in the yellow cell. (This "sample" is not a sample of data but a list of equally likely possibilities.) Set the drop down menu in the orange cell to Total. In the Single resample sheet, set th…
	When I did this I got the graph on the right, and when I put 4 and 8 in the Percentage equal to green cells I found that the probability of four girls was 26.5% (265 times out of 1000 resamples each representing one family) and of 8 girls was 0.7%. For comparison the answer for four girls from the formula, =BINOMDIST(4,8,0.5,FALSE) , was 27.3%.
	As a second example, suppose you've got a football team which scores an average of 2 goals a match. How many times are they likely to score 0 goals, 1 goal, 2 goals etc? The answer obviously depends on the standard of the opposing team, but it is interesting to imagine that all opposing teams are of roughly equal standard and that scoring goals is essentially a random process. The way to do this …
	As a third example, suppose you've produced a batch of 100 products and you know that 5 of them are faulty. The customer checks 10 of the batch. How likely is she to find a faulty product. To simulate this, you need 5 ones and 95 zeros in the sample with the left hand orange cell set to Total. Then set the left hand orange cell in Single resample to WITHOUT replacement (first column only), and us…

## Sheet: Extras
Extras
Tweaks, etc - notes to help (on the assumption that you are reasonably familiar with Excel formulae)
Nothing in this spreadsheet is locked so it can easily be edited. However, please note that some apparently blank cells contain formulae: be careful not to delete these by mistake. And take care if you cut and paste (especially in the green cells for data in the Sample sheet) as this may change the cells to which formulae refer.
Some of the text in the spreadsheet can be changed by editing the appropriate cells in this sheet below.
There are some hidden columns in the Sample, Single resample and Lots of resamples sheets. To see these: View - tick Headings, then select the A column heading and the next one, right click and click Unhide.
If you want to analyze other statistics - eg the maximum or slope (regression coefficient) - edit the formulae in the pink cell in the Sample sheet. For example, if you want to analyse the range, you could replace MEDIAN(D5:D504) with MAX(D5:D504)-MIN(D5:D504). Then copy the edited formula to the pink cell in the Single resample sheet. Then change the name of the statistic in the list of Statisti…
You can enter other statistics at the bottom right of the Lots of resamples sheet. Look at the formula for the mean to see how it works.
The maximum sample and resample size are currently set to 500. To increase these, delete any data in the green cells in the Sample sheet, unhide the hidden columns (see 3 above), then go to, say row 20 and insert the appropriate number of rows. Inserting the rows in the middle will automatically extend various named and unnamed ranges, and the formatting of the cells. You then need to copy the fo…
The spreadsheet is set to do 1000 (or 20) resamples. To change this, go to the Lots of resamples sheet, unhide the hidden columns (see 3) and delete the data table in E5:E1004. To make a data table containing 2000 resamples, go to D1003:D1004, and pull the selection down by the right hand corner so that the numbers continue from 1000 to 2000. To make the larger data table, select D5:E2004, then c…
Sometimes you may want to resample within subgroups. To do this you need to edit Column C or D of the Single resample sheet. First you will need to unhide them as explained in 3 above. Then, for example, if you wanted to to resample with replacement within the vegetarian and non-vegetarian groups separately (see Example 1, part 3 in the Introduction sheet) put the formula =RANDBETWEEN(1,9) in D5:…
The tables below make the rest of the workbook work - take care if you change them!
ResamplingType	WITHOUT/WITH REP	SECOND COLUMN	MinResample	MaxResample	Resample size	Note on resample size
WITHOUT replacement (first column only)	1	1	1	20	8	Resample size must be between 1 and 20
WITH replacement (first column only)	2	1	1	500	8	Resample size must be between 1 and 500
WITHOUT replacement, second column FIXED	1	2	20	20	20	Resample size must be 20
WITH replacement, second column FIXED	2	2	20	20	20	Resample size must be 20
WITHOUT replacement, BOTH columns	1	3	1	20	8	Resample size must be between 1 and 20
WITH replacement, BOTH columns	2	3	1	500	8	Resample size must be between 1 and 500
StatisticType	All text about statistics type in this box
Mean (or proportion) of first column	1	For a proportion the first column should contain 1s and 0s only
Difference of two means (or proportions)	2	The first column should contain numbers or 1s and 0s, and the second column group labels	Group mean or proportion
Median of first column	3
Correlation coefficient (Pearson)	4	There must be numbers in both columns
Total	5
NoResamples
20 resamples	1
1000 resamples	2
ResampleSize
Resample size same as sample size	1
Resample size in green cell below	2
